# Supplementary material for: A new type of ordered mesoporous carbon/polyaniline composites prepared by a two-step nanocasting method for high performance supercapacitor applications
Source: Royal Society of Chemistry journal article supplement (doi:10.1039/c4ta03351e), 2014-08-13
Supplement: c4ta03351e1.pdf [file c4ta03351e1.pdf]

1

## Supplementary

2

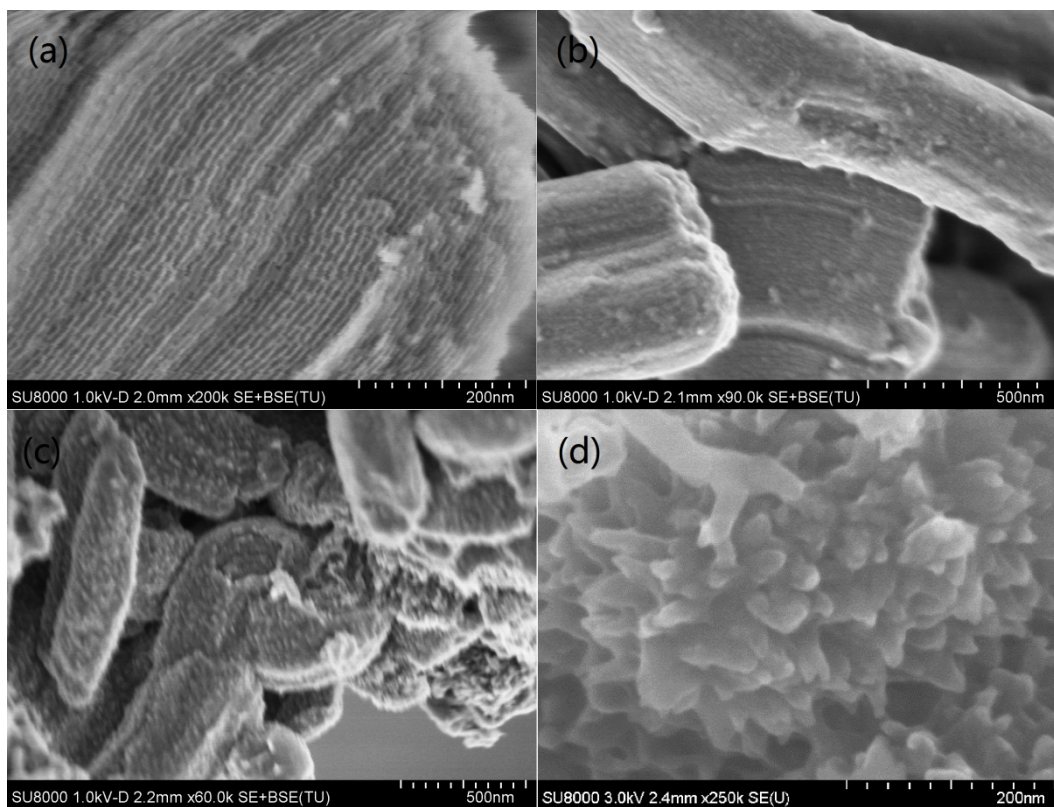

3

4 **Figure S1** Textural characterization of the prepared carbons: FESEM images of (a)

5 SBA-15, (b) OMC8, (c) and (d) OMC8/PANI

6

7

8

9

10

1

2

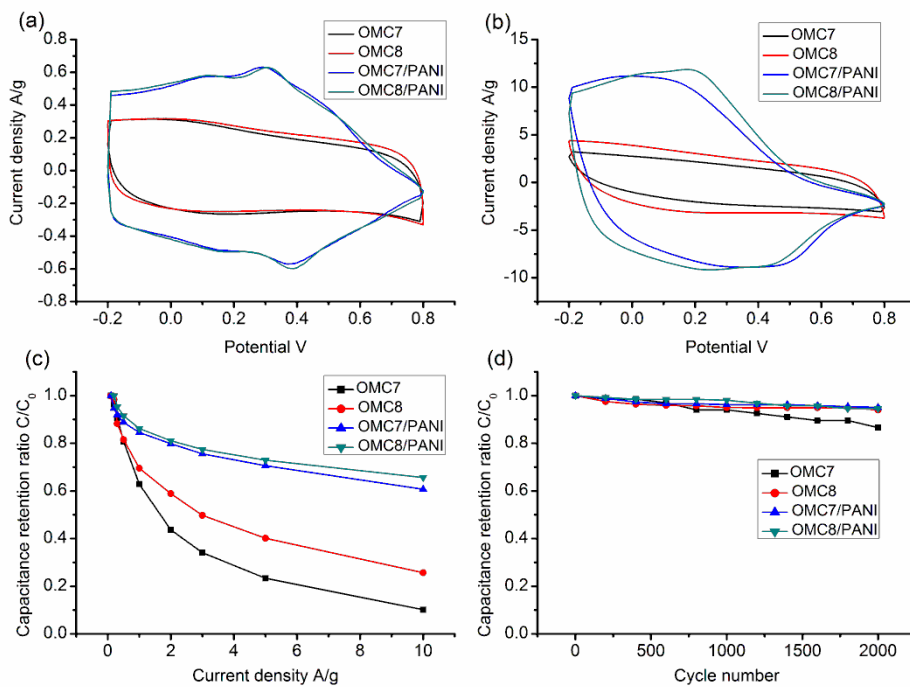

3

4 **Figure S2** Electrochemical performances of the prepared samples: CV curves at (a)  
5 5 mV/s and (b) 100 mV/s, (c) capacitance retention, (d) Normalized cycle life test for  
6 2000 cycles at 2A/g

7

8

9

10

1

2

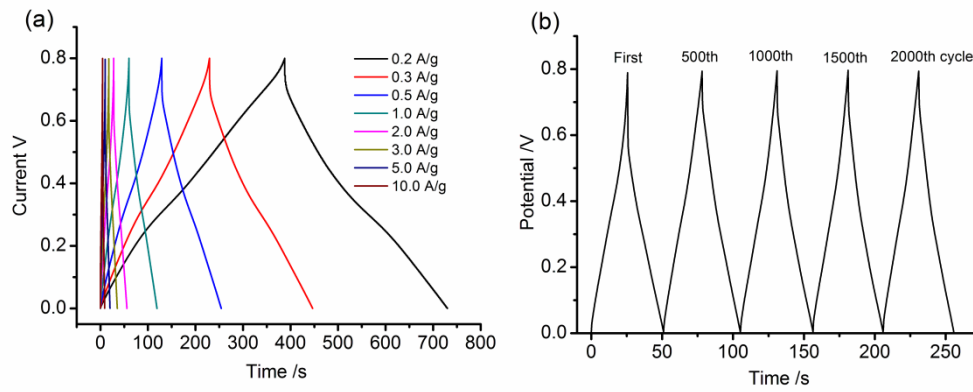

3

4 **Figure S3** Galvanostatic charge/discharge Curves of OMC8/PANI, (a) at current

5 density of 0.2-10 A/g, (b) cyclic test at 2A/g for 2000 cycles

6

7

8

9

10

11

12

13

1

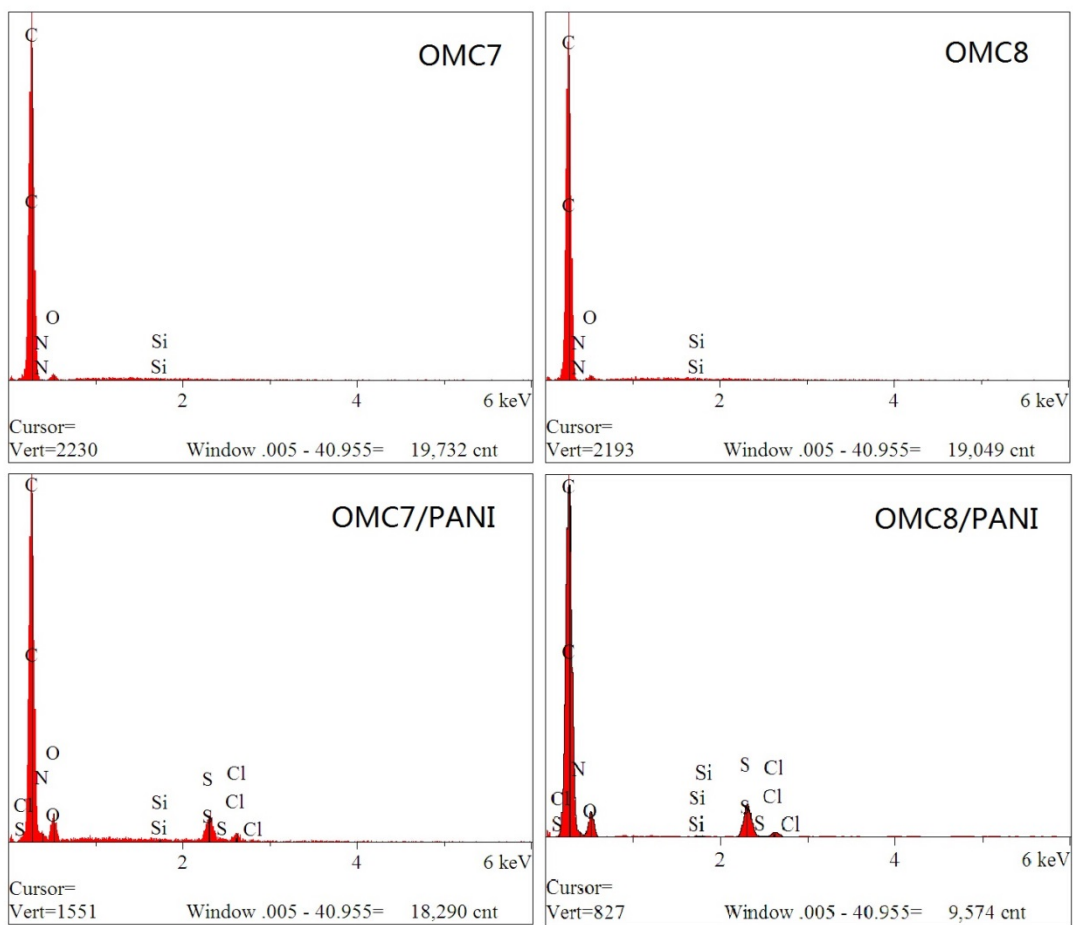

2

3 **Figure S4** Scanning electron microscope energy dispersive X-ray spectra (SEM-  
4 EDS) of samples.

5
